# Supplementary material
Source: publisher site journal article supplement (http://e-cmh.org/upload/media/cmh-2021-0355-suppl7.pdf)
Supplement: Supplementary file 1 [file cmh-2021-0355-suppl7.pdf]

**Supplementary Table 1.** Mean and standard deviation of age at death by sex, year of death, and cause of death

| Characteristic        | Total       | Male        | Female      |
|-----------------------|-------------|-------------|-------------|
| Total                 | 63.4 (12.3) | 61.7 (11.9) | 68.4 (12.2) |
| Year of death         |             |             |             |
| 2000                  | 59.9 (12.0) | 58.3 (11.5) | 65.2 (12.3) |
| 2016                  | 66.6 (12.4) | 64.8 (11.9) | 71.8 (12.1) |
| Cause of death        |             |             |             |
| Liver cancer          | 63.1 (12.3) | 61.5 (11.8) | 68.2 (12.2) |
| Cancer of other sites | 67.8 (10.4) | 67.5 (9.9)  | 68.4 (11.5) |
| Non-cancer causes     | 66.1 (12.5) | 64.4 (12.1) | 71.5 (12.2) |

Values are presented as mean (standard deviation).

Patients diagnosed with primary liver cancer from January 1, 2000 to December 31, 2016 who were followed up to December 31, 2017. Patients who were aged under 20 years at diagnosis were excluded.
